# Supplementary material
Source: Springer Nature journal article supplement (https://www.springermedizin.de/resource/supplementary/12885_2013_4619_MOESM13_ESM.pdf/9466890)

Begg's funnel plot with pseudo 95% confidence limits

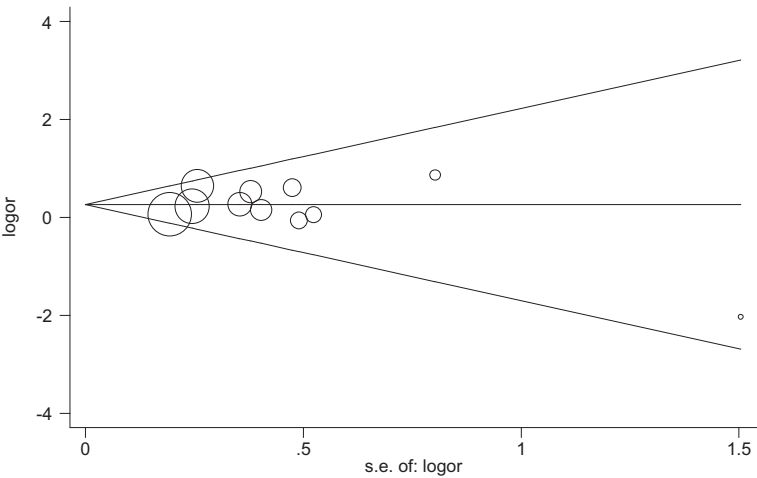

Supplement: MOESM13 [file 9466890]
